# Supplementary material
Source: PubMed Central journal article supplement (PMC5552367)
Supplement: NIHMS887216-supplement-3.pdf [file NIHMS887216-supplement-3.pdf]

## A Downregulated genes

| GO Term                                                                        | Count | P-Value | Benjamini |
|--------------------------------------------------------------------------------|-------|---------|-----------|
| TOR signaling                                                                  | 3     | 1.1E-3  | 3.6E-1    |
| cellular response to corticotropin-releasing hormone stimulus                  | 2     | 1.1E-2  | 8.9E-1    |
| protein localization                                                           | 3     | 1.1E-2  | 7.8E-1    |
| positive regulation of transcription from RNA polymerase II promoter           | 7     | 1.6E-2  | 8.1E-1    |
| negative regulation of transcription from RNA polymerase II promoter           | 6     | 1.6E-2  | 7.4E-1    |
| negative regulation of hormone secretion                                       | 2     | 2.1E-2  | 7.7E-1    |
| negative regulation of pri-miRNA transcription from RNA polymerase II promoter | 2     | 2.1E-2  | 7.7E-1    |
| post-embryonic development                                                     | 3     | 2.4E-2  | 7.6E-1    |
| negative regulation of cAMP-dependent protein kinase activity                  | 2     | 3.1E-2  | 8.1E-1    |
| neuron maturation                                                              | 2     | 3.1E-2  | 8.1E-1    |
| clathrin coat assembly                                                         | 2     | 3.1E-2  | 8.1E-1    |

## B Upregulated genes

| GO Term                                                  | Count | P-Value | Benjamini |
|----------------------------------------------------------|-------|---------|-----------|
| heart development                                        | 10    | 5.8E-5  | 4.5E-2    |
| protein phosphorylation                                  | 12    | 1.5E-3  | 4.5E-1    |
| positive regulation of telomere capping                  | 3     | 4.9E-3  | 7.3E-1    |
| organ morphogenesis                                      | 5     | 5.8E-3  | 6.9E-1    |
| negative regulation of MAPK cascade                      | 3     | 6.8E-3  | 6.7E-1    |
| regulation of JNK cascade                                | 3     | 6.8E-3  | 6.7E-1    |
| protein glycosylation                                    | 5     | 7.3E-3  | 6.2E-1    |
| protein ADP-ribosylation                                 | 3     | 7.6E-3  | 5.8E-1    |
| transcription elongation from RNA polymerase II promoter | 3     | 9.1E-3  | 6.0E-1    |
| response to calcium ion                                  | 4     | 1.0E-2  | 6.0E-1    |

## C Upregulated genes\_Telomerase pathway

| GENE NAME                                                               |
|-------------------------------------------------------------------------|
| epidermal growth factor receptor(Egfr)                                  |
| insulin-like growth factor I receptor(Igf1r)                            |
| tankyrase, TRF1-interacting ankyrin-related ADP-ribose polymerase(Tnks) |

Figure S3
