# Supplementary material
Source: PubMed Central journal article supplement (PMC5552367)
Supplement: NIHMS887216-supplement-10.pdf [file NIHMS887216-supplement-10.pdf]

**Table S3. RT-qPCR primers.**

This Table relates to Figures 2, 4, 6, and the Methods.

| PRIMERS                                                                               | SOURCE                         |
|---------------------------------------------------------------------------------------|--------------------------------|
| q-PCR primers for Terc,<br>F:CCGCTGTTTTTCTCGCTGAC;<br>R: GTTTTTGAGGCTCGGGAACG         | Integrated DNA<br>Technologies |
| q-PCR primers for GAPDH,<br>F:CGTCCCGTAGACAAAATGGT;<br>R:TTGATGGCAACAATCTCCAC         | Integrated DNA<br>Technologies |
| q-PCR primers for Erdr1,<br>F:CACAGTGATGTCACCCACGA;<br>R:GTGAGAATCGCTCCGTCCTG         | Integrated DNA<br>Technologies |
| q-PCR primers for Mid1 exon-8-9,<br>F:GATCGTGCCCAACATCAAGC;<br>R:TCGACAGTCAGGTTGTCGTG | Integrated DNA<br>Technologies |
| q-PCR primers for Asmt,<br>F: GAAGTGGGACAGGAAGTGAG;<br>R: CGGGAACAGGAAGTGGC           | Integrated DNA<br>Technologies |
| q-PCR primers for Wls,<br>F: CCAGTCTAATGGTGACCTGGG;<br>R: TGAGAGTCAGCATGCACCAG        | Integrated DNA<br>Technologies |
| q-PCR primers for Tmx3,<br>F: TACCGAGGACCACGGACTAA;<br>R: AATACACGGTGCCTCTTCCG        | Integrated DNA<br>Technologies |

|                                                                                 |                                |
|---------------------------------------------------------------------------------|--------------------------------|
| q-PCR primers for Lphn2,<br>F: ACCTCCCTGATGCCTTCAAA;<br>R: GCTCCATGTAAGGGACACAT | Integrated DNA<br>Technologies |
| q-PCR primers for Nfib,<br>F: GGGTGGAAACCGGTGAATCTT;<br>R: CGGAAAGGATCGGAAGGACC | Integrated DNA<br>Technologies |
| q-PCR primers for Fyco1,<br>F: ATGTCCAAAATGCCTCCGGT;<br>R: AAGGCTCAGGAGAACAGCAC | Integrated DNA<br>Technologies |
