# Supplementary material
Source: PubMed Central journal article supplement (PMC5552367)

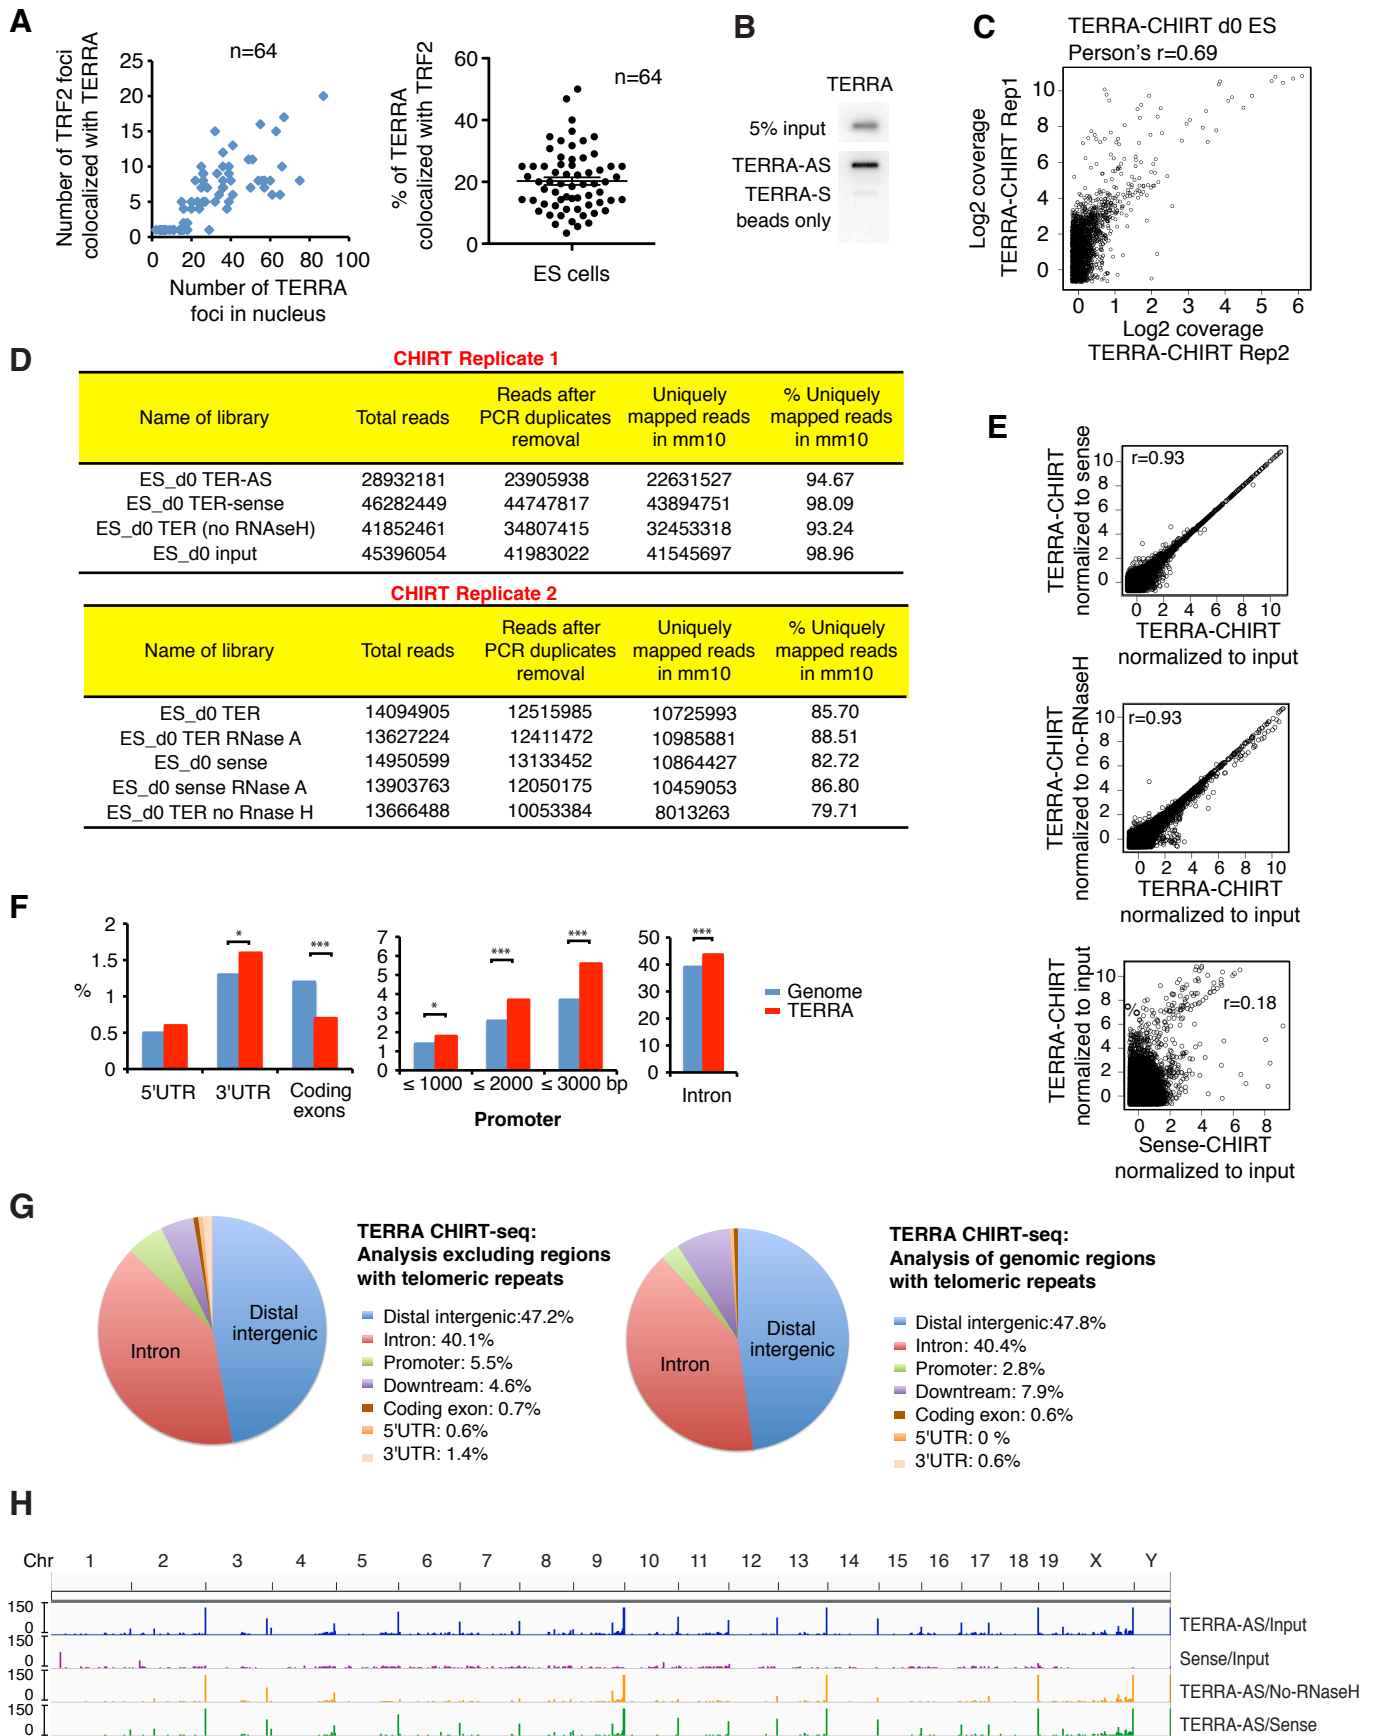

Figure S1

Supplement: NIHMS887216-supplement-1.pdf [file NIHMS887216-supplement-1.pdf]

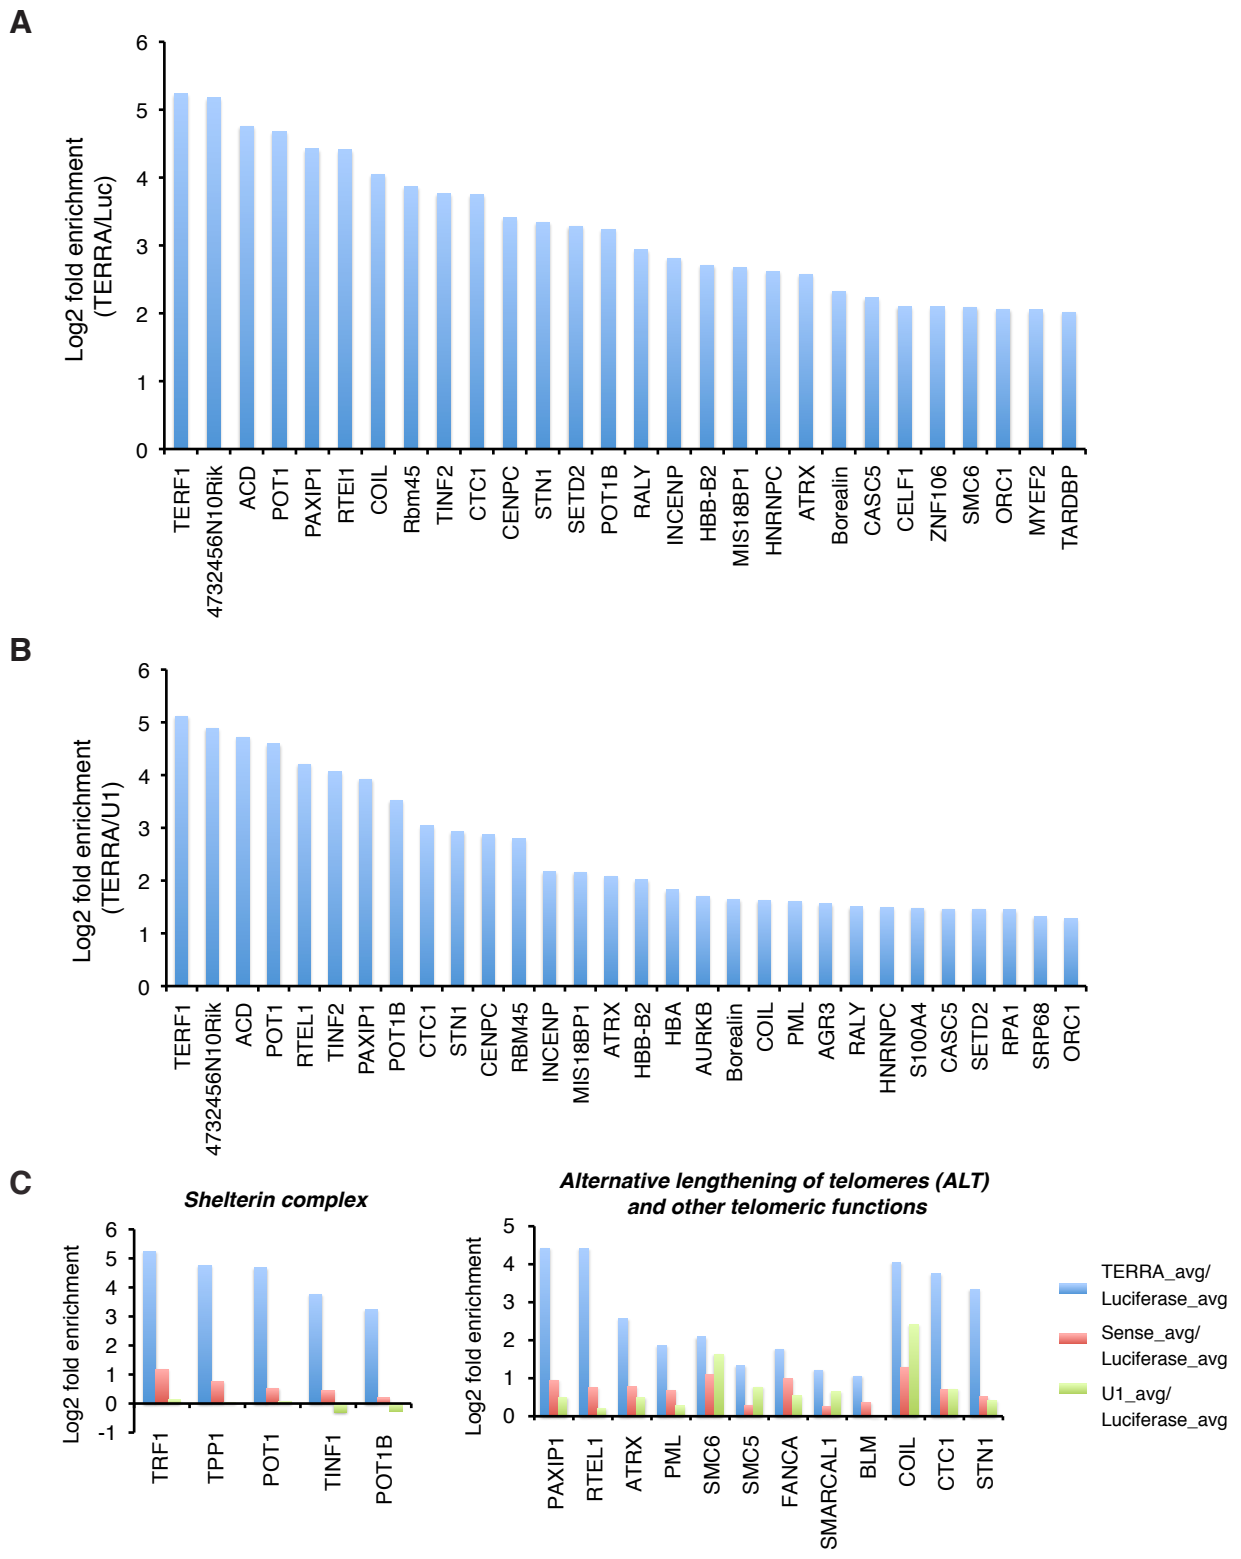

Figure S4

Supplement: NIHMS887216-supplement-4.pdf [file NIHMS887216-supplement-4.pdf]

**A**

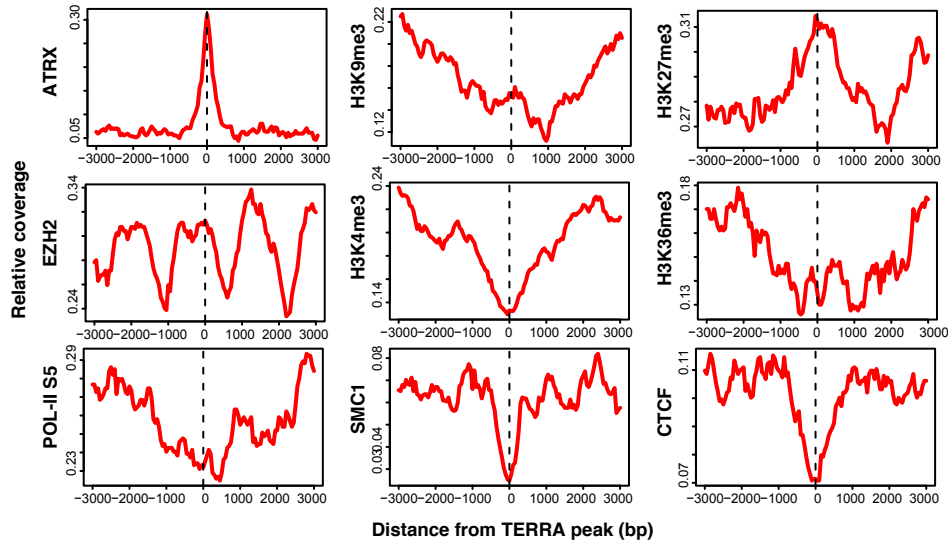

**B**

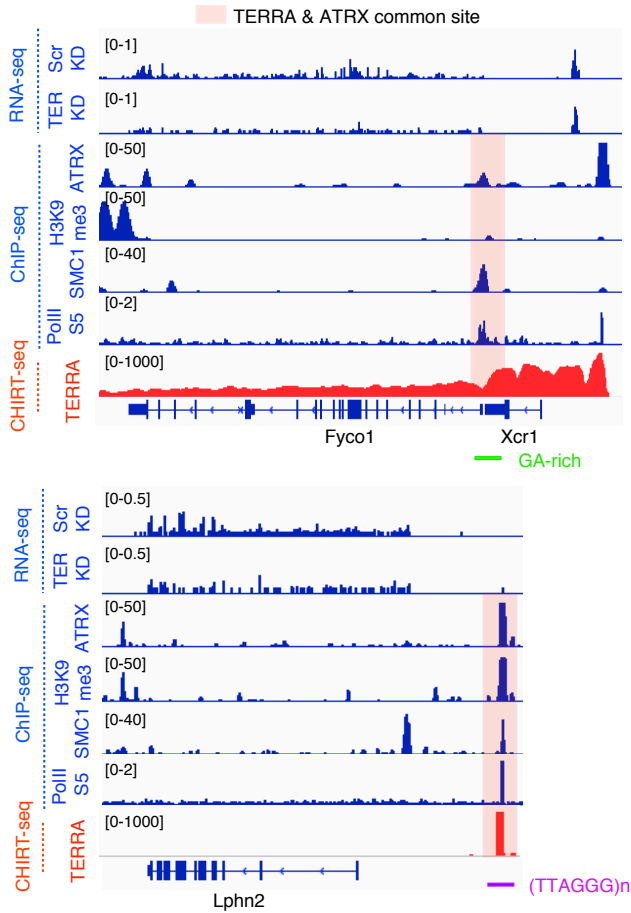

**C**

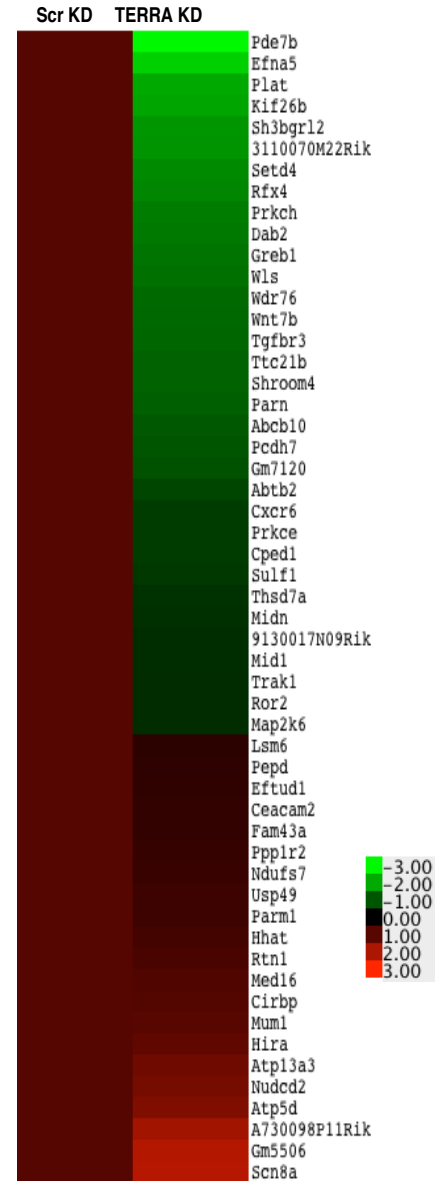

Figure S5

Supplement: NIHMS887216-supplement-5.pdf [file NIHMS887216-supplement-5.pdf]

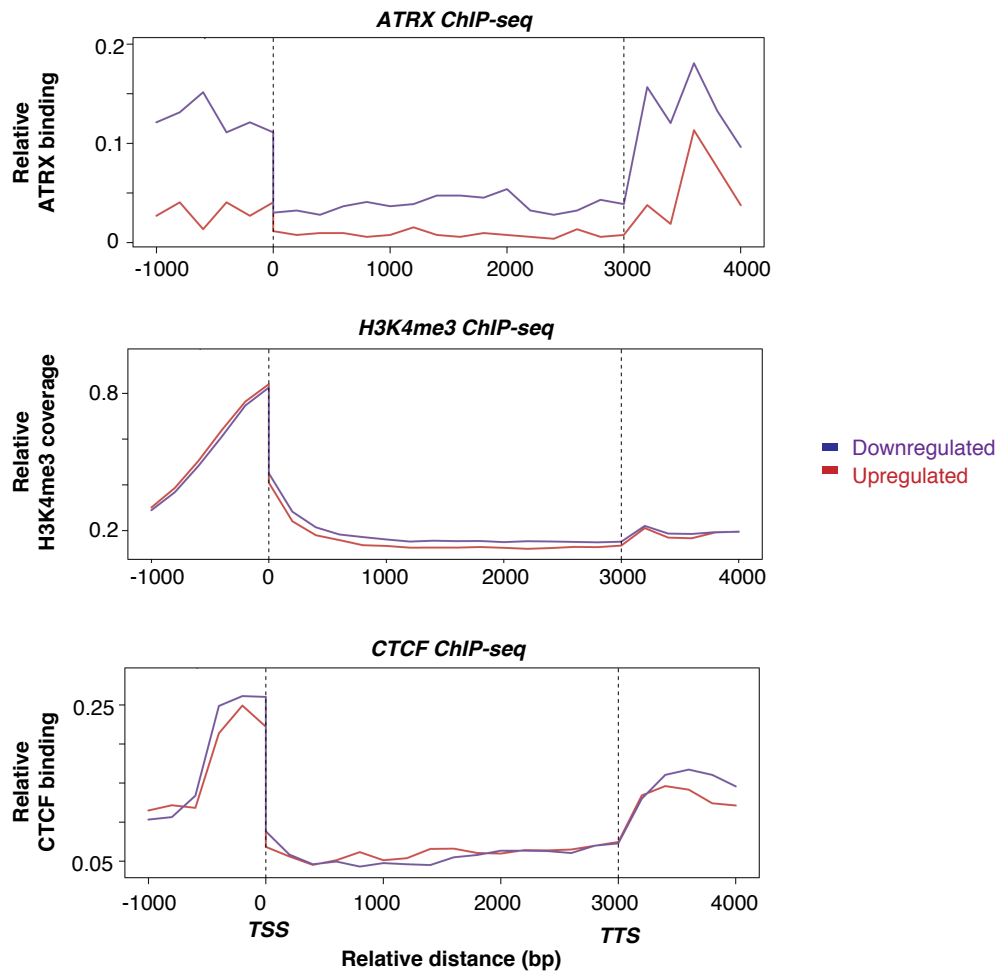

Figure S6

Supplement: NIHMS887216-supplement-6.pdf [file NIHMS887216-supplement-6.pdf]

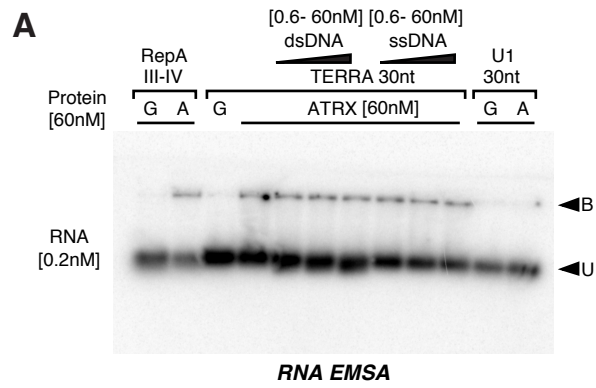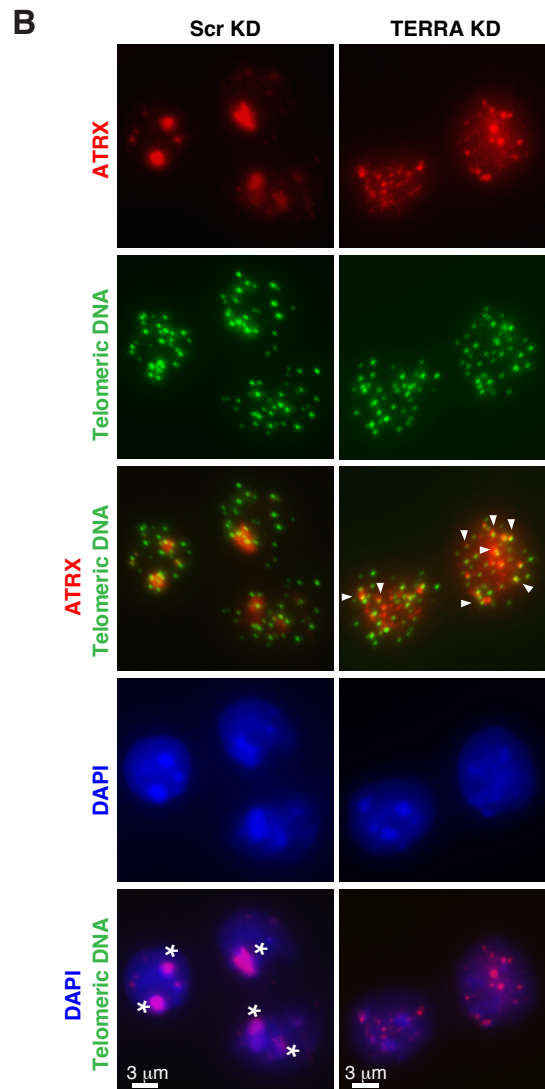

Figure S7

Supplement: NIHMS887216-supplement-7.pdf [file NIHMS887216-supplement-7.pdf]
